**Recipient-biased competition for a cross-fed nutrient is required  
for coexistence of microbial mutualists**

Alexandra L. McCully, Breah LaSarre, James B. McKinlay<sup>#</sup>

Department of Biology, Indiana University, Bloomington, IN

Running title: Biased competition within a mutualism

<sup>#</sup>Corresponding author. 1001 E 3<sup>rd</sup> Street, Jordan Hall, Bloomington, IN 47405

Phone: 812-855-0359

Email: [jmckinla@indiana.edu](mailto:jmckinla@indiana.edu)

**Conflict of interest.**

The authors declare no conflict of interest.

**Abstract.** Many mutualistic microbial relationships are based on nutrient cross-feeding. Traditionally, cross-feeding is viewed as being unidirectional from the producer to the recipient. This is likely true when a producer's metabolic waste, such as fermentation products, provides carbon for a recipient. However, in some cases the cross-fed nutrient holds value for both the producer and the recipient. In such cases, there is potential for nutrient reacquisition by producer cells in a population, leading to competition against recipients. Here we investigate the consequences of inter-partner competition for cross-fed nutrients on mutualism dynamics using an anaerobic coculture pairing fermentative *Escherichia coli* and phototrophic *Rhodospseudomonas palustris*. In this coculture, *E. coli* excretes waste organic acids that provide carbon for *R. palustris*. In return, *R. palustris* cross-feeds *E. coli* ammonium ( $\text{NH}_4^+$ ), a valuable nitrogen compound that both species prefer. To explore the potential for inter-partner competition, we first used a kinetic model to simulate cocultures with varied affinities for  $\text{NH}_4^+$  in each species. The model predicted that inter-partner competition for cross-fed  $\text{NH}_4^+$  could profoundly impact population dynamics. We then experimentally tested the predictions by culturing mutants lacking  $\text{NH}_4^+$  transporters in both  $\text{NH}_4^+$  competition assays and cooperative cocultures. Both theoretical and experimental results indicated that the recipient must have a competitive advantage in acquiring valuable cross-fed  $\text{NH}_4^+$  to avoid collapse of the mutualism. Thus, the very metabolites that form the basis for cooperative cross-feeding can also be subject to competition between mutualistic partners.

**Significance.** Mutualistic relationships, particularly those based on nutrient cross-feeding, promote stability of diverse ecosystems and drive global biogeochemical cycles. Cross-fed nutrients within these systems can be either waste products valued only by one partner or nutrients that both partners value. Here, we explore how inter-partner competition for a communally-valuable cross-fed nutrient impacts mutualism dynamics. We discovered that mutualism stability necessitates that the recipient have a competitive advantage against the producer in obtaining the cross-fed nutrient. We propose that the requirement for recipient-biased competition is a general rule for mutualistic coexistence based on the transfer of communally valuable resources, microbial or otherwise.

## Introduction

Mutualistic cross-feeding of resources between microbes can have broad impacts ranging from influencing host health (1, 2) to driving global biogeochemical cycles (3–6). Cross-fed metabolites are often regarded as nutrients due to the value they provide to a dependent partner, the recipient. However, for the partner producing the nutrient, the producer, a cross-fed nutrient's value can vary. On one extreme, the cross-fed metabolite is valued by the recipient but not the producer, as is the case for fermentative waste products (7–10). In other cases, a cross-fed metabolite holds value for both the recipient and the producer, as is the case for vitamin B<sub>12</sub> (6, 11, 12) and ammonium (NH<sub>4</sub><sup>+</sup>) (13, 14). Such communally-valuable cross-fed nutrients are subject to partial privatization (15), wherein the producer has mechanisms to retain a portion of the nutrient pool for itself. While most mutualism cross-feeding studies only consider unidirectional metabolite transfer from producer to recipient, we wondered whether these mechanisms for partial privatization could lead to competition between partner populations for communally-valuable cross-fed nutrients. It seems likely that such competition could influence mutualism stability, as is known to be the case for competition for exogenous limiting resources (8, 16–19). To the best of our knowledge inter-partner competition for cross-fed nutrients and its impact on mutualism dynamics have never been investigated.

One example of cross-feeding that could involve competition between mutualistic partners is NH<sub>4</sub><sup>+</sup> excretion by N<sub>2</sub>-fixing bacteria (Fig. 1A), called N<sub>2</sub>-fixers (13, 14). During N<sub>2</sub> fixation, the enzyme nitrogenase converts N<sub>2</sub> gas into two NH<sub>3</sub> (20). In an aqueous environment, NH<sub>3</sub> is in equilibrium with NH<sub>4</sub><sup>+</sup>. At neutral pH, NH<sub>4</sub><sup>+</sup> is the predominant form but small amounts of NH<sub>3</sub> can potentially leave the cell by diffusion across the membrane (21) (Fig. 1B). This inherent 'leakiness' for NH<sub>3</sub> likely fosters NH<sub>4</sub><sup>+</sup> cross-feeding, as extracellular NH<sub>3</sub> is available to neighboring microbes. Importantly, these neighbors can include clonal N<sub>2</sub>-fixers, as NH<sub>3</sub>/NH<sub>4</sub><sup>+</sup> is a preferred nitrogen source for most microbes. At concentrations above 20 μM, NH<sub>3</sub> can be acquired by passive diffusion; below 20 μM, NH<sub>4</sub><sup>+</sup> is bound and transported as NH<sub>3</sub> by AmtB transporters (Fig. 1B) (22). AmtB-like transporters are conserved throughout all domains of life (23). There is growing evidence that AmtB is used by N<sub>2</sub>-fixers to recapture NH<sub>3</sub> lost

by passive diffusion, as  $\Delta$ AmtB mutants accumulate  $\text{NH}_4^+$  in culture supernatants whereas wild-type strains do not (24–26). Thus, during  $\text{NH}_4^+$  cross-feeding, AmtB likely facilitates both  $\text{NH}_4^+$  acquisition by the mutualistic partner and recapture of  $\text{NH}_4^+$  by the  $\text{N}_2$ -fixer.

Assessing the effects of inter-partner competition for a cross-fed nutrient would require a level of experimental control not possible in most natural settings. However, synthetic microbial communities, or cocultures, are well-suited to address such questions (27–29). We previously developed a bacterial coculture that features cross-feeding of waste products (organic acids) from *Escherichia coli*, and a communally-valuable nutrient ( $\text{NH}_4^+$ ) from *Rhodopseudomonas palustris* Nx (Fig. 1A) (26). Here, using both a kinetic model and genetic manipulation to alter the affinity of each species in the coculture for  $\text{NH}_4^+$ , we demonstrate that inter-partner competition for cross-fed  $\text{NH}_4^+$  plays a direct role in maintaining coexistence. Specifically, insufficient competition by *E. coli* for  $\text{NH}_4^+$  resulted in a collapse of the mutualism. Mutualism collapse could be delayed or potentially avoided through higher net  $\text{NH}_4^+$  excretion by *R. palustris* or increased *E. coli* population size. Our results suggest that, as a general rule, competition for a cross-fed nutrient in an obligate mutualism must be biased in favor of the recipient to avoid mutualism collapse and the potential extinction of both species.

## Results

**Competition for cross-fed  $\text{NH}_4^+$  is predicted to shape mutualism population dynamics.** Within our coculture (Fig. 1A), *E. coli* (*Ec*) ferments sugars into waste organic acids, providing essential carbon and electrons to *R. palustris* (*Rp*) Nx. *R. palustris* Nx is genetically engineered to excrete low micromolar amounts of  $\text{NH}_4^+$ , providing essential nitrogen for *E. coli* (26).  $\text{NH}_4^+$  excretion by *R. palustris* Nx is due to mutation of NifA, the master transcriptional regulator of nitrogenase, which results in constitutive nitrogenase activity even in the presence of normally inhibitory  $\text{NH}_4^+$  (30). In contrast to organic acids, which are only useful to *R. palustris*,  $\text{NH}_4^+$  produced by *R. palustris* Nx is essential for the growth of both species; *R. palustris* uses some  $\text{NH}_4^+$  for its own biosynthesis and excretes the rest, which serves as the nitrogen source for *E. coli*. However, *R. palustris* Nx can also take up  $\text{NH}_4^+$  (30). Thus, we hypothesized

that competition for cross-fed  $\text{NH}_4^+$  between the *R. palustris*  $\text{N}_x$  producer population and the *E. coli* recipient population could influence mutualism dynamics.

We first explored whether competition for cross-fed  $\text{NH}_4^+$  could affect the mutualism using SyFFoN, a mathematical model describing our coculture (26, 31). SyFFoN simulates population and metabolic dynamics in batch cocultures using Monod equations with experimentally-determined parameter values. As previous versions described  $\text{NH}_4^+$  uptake kinetics only for *E. coli* (26, 31), we amended SyFFoN to include both an *R. palustris*  $\text{NH}_4^+$  uptake affinity ( $K_m$ ) and higher *R. palustris* maximum growth rate ( $\mu_{\text{MAX}}$ ) when  $\text{NH}_4^+$  is used (SI Appendix Table S1). We then simulated batch cocultures wherein the relative affinity for  $\text{NH}_4^+$  varied between the two species (Fig. 2). The model predicted that coexistence is maintained when the *R. palustris* affinity for  $\text{NH}_4^+$  is low relative to that of *E. coli* ( $R_p:Ec < 1$ ); sufficient  $\text{N}_2$  is converted to  $\text{NH}_4^+$  to support *R. palustris* growth and enough  $\text{NH}_4^+$  is cross-fed to support *E. coli* growth. In contrast, when the *R. palustris* affinity for  $\text{NH}_4^+$  is high relative to that of *E. coli* ( $R_p:Ec > 1$ ), *E. coli* growth is no longer supported because *E. coli* cannot compete for excreted  $\text{NH}_4^+$ . However, high *R. palustris* cell densities were still predicted (Fig. 2) due to persistent, low-level organic acid cross-feeding stemming from *E. coli* maintenance metabolism, which can support *R. palustris* growth even when *E. coli* is not growing (31).

**Genetic disruption of AmtB  $\text{NH}_4^+$  transporters affects relative affinities for  $\text{NH}_4^+$ .** Bacterial cells generally acquire  $\text{NH}_4^+$  through two mechanisms: passive diffusion of  $\text{NH}_3$ , or active uptake by AmtB transporters (Fig. 1B). We hypothesized that deleting *amtB* genes in either species would result in a lower affinity for  $\text{NH}_4^+$  in that species and thus could be used to test how relative  $\text{NH}_4^+$  affinity impacts coculture dynamics. We generated  $\Delta\text{AmtB}$  mutants of both *E. coli* and *R. palustris* and first characterized the effect of the mutations in monoculture. Deletion of *amtB* in *E. coli* had no effect on growth or fermentation profiles when  $\text{NH}_4\text{Cl}$  was in excess (SI Appendix Fig. S1), consistent with previous observations where  $\Delta\text{AmtB}$  growth defects were only apparent at  $\text{NH}_4^+$  concentrations below 20  $\mu\text{M}$  (22). In *R. palustris*  $\Delta\text{AmtB}$  monocultures with  $\text{N}_2$  as the nitrogen source, growth trends were equivalent to

those of the parent strain; however, *R. palustris*  $\Delta$ AmtB excreted more  $\text{NH}_4^+$  than the parent strain and about a third of that excreted by *R. palustris* Nx (SI Appendix Fig. S1C and D). In line with our hypothesis,  $\text{NH}_4^+$  excretion by *R. palustris*  $\Delta$ AmtB could be due to a decreased ability to reacquire  $\text{NH}_4^+$  lost by diffusion, resulting in increased net  $\text{NH}_4^+$  excretion. Alternatively, we considered that  $\text{NH}_4^+$  excretion by *R. palustris*  $\Delta$ AmtB could be due to improper nitrogenase regulation. In several other  $\text{N}_2$ -fixers, proper nitrogenase regulation requires AmtB, for example to induce post-translational nitrogenase inhibition (switch-off) in response to  $\text{NH}_4^+$  (25, 32). We tested whether *R. palustris*  $\Delta$ AmtB exhibits  $\text{NH}_4^+$ -induced switch-off by adding  $\text{NH}_4\text{Cl}$  to exponentially growing cultures and measuring  $\text{H}_2$  production, an obligate product of the nitrogenase reaction (33), as a proxy for nitrogenase activity. Upon adding  $\text{NH}_4\text{Cl}$ ,  $\text{H}_2$  production stopped in *R. palustris*  $\Delta$ AmtB cultures. In contrast,  $\text{H}_2$  production only slowed slightly in *R. palustris* Nx cultures (SI Appendix Fig. S2), consistent with previous observations for NifA\* strains (34, 35). Additionally, like the parent strain, *R. palustris*  $\Delta$ AmtB did not produce  $\text{H}_2$  when grown with  $\text{NH}_4^+$ , unlike *R. palustris* Nx (SI Appendix Fig. S3). These observations demonstrate that *R. palustris*  $\Delta$ AmtB is competent for  $\text{NH}_4^+$ -induced nitrogenase repression, and thus  $\text{NH}_4^+$  excretion by *R. palustris*  $\Delta$ AmtB is likely due to a poor ability to reacquire  $\text{NH}_4^+$  lost by diffusion.

To test our hypothesis that deleting *amtB* would lower cellular affinity for  $\text{NH}_4^+$ , we directly competed all possible *E. coli* and *R. palustris* strain combinations in competition assays where ample carbon was available for each species but the  $\text{NH}_4^+$  concentration was kept low; specifically, a small amount of  $\text{NH}_4^+$  was added every hour to bring the final  $\text{NH}_4^+$  concentration to 5  $\mu\text{M}$  (Fig. 3). In this competition assay, the species that is more competitive for  $\text{NH}_4^+$  should reach a higher cell density than the other species. In all cases, WT *E. coli* was more competitive for  $\text{NH}_4^+$  than *R. palustris*. However, each *R. palustris* strain was able to outcompete *E. coli*  $\Delta$ AmtB (Fig. 3), even though the *R. palustris* maximum growth rate is 4.6-times slower than that of *E. coli* (SI Appendix Fig. S1). Even *R. palustris* strains lacking AmtB outcompeted *E. coli*  $\Delta$ AmtB (Fig. 3), indicating that *R. palustris* has a higher affinity for  $\text{NH}_4^+$  than *E. coli* independent of AmtB. These data confirmed that deletion of *amtB* was an effective means by which to lower the relative affinity for  $\text{NH}_4^+$  in each mutualistic partner.

**Altering relative  $\text{NH}_4^+$  affinities affects mutualistic partner frequencies.** We then examined how relative affinities for  $\text{NH}_4^+$  influenced mutualism dynamics by comparing the growth trends of cocultures containing either WT *E. coli* or *E. coli*  $\Delta\text{AmtB}$ , paired with either *R. palustris*  $\Delta\text{AmtB}$ , *R. palustris* Nx, or *R. palustris* Nx $\Delta\text{AmtB}$ , the latter of which we previously determined to exhibit 3-fold higher  $\text{NH}_4^+$ -excretion levels than the Nx strain in monoculture (26). For each *R. palustris* partner, cocultures with *E. coli*  $\Delta\text{AmtB}$  grew slower than cocultures with WT *E. coli* (Fig. 4A,B). *E. coli*  $\Delta\text{AmtB}$  also constituted a lower percentage of the population and achieved lower cell densities compared to WT *E. coli* when paired with the same *R. palustris* strain (Fig. 4C). These lower frequencies were consistent with the competitive disadvantage of *E. coli*  $\Delta\text{AmtB}$  for excreted  $\text{NH}_4^+$  (Fig. 3).

For *R. palustris* strains lacking AmtB, the effects on population trends varied. Consistent with our previous work, *R. palustris* Nx $\Delta\text{AmtB}$  supported higher WT *E. coli* percentages and cell densities (Fig. 4C) (26). With high  $\text{NH}_4^+$  excretion levels from *R. palustris* Nx $\Delta\text{AmtB}$ , faster *E. coli* growth leads to rapid organic acid accumulation, which acidifies the environment, inhibits *R. palustris* growth, and leaves organic acids unconsumed (Fig. 4D) (26). Surprisingly, although *R. palustris*  $\Delta\text{AmtB}$  excreted less  $\text{NH}_4^+$  than *R. palustris* Nx in monoculture, *R. palustris*  $\Delta\text{AmtB}$  supported a higher WT *E. coli* population in coculture and consumable organic acids accumulated (Fig. 4C, D). These trends resemble those from cocultures with *R. palustris* Nx $\Delta\text{AmtB}$  (Fig. 4C, D), which has a high level of  $\text{NH}_4^+$  excretion (SI Appendix Fig. S1D). Unlike Nx strains, which have constitutive nitrogenase activity due to a mutation in the transcriptional activator NifA (30), *R. palustris*  $\Delta\text{AmtB}$  has WT NifA. Thus, *R. palustris*  $\Delta\text{AmtB}$  can likely still regulate nitrogenase expression, and thereby its activity, in response to nitrogen starvation. We hypothesized that in coculture with WT *E. coli*, *R. palustris*  $\Delta\text{AmtB}$  might experience heightened nitrogen starvation, as  $\text{NH}_4^+$  consumption by WT *E. coli* would limit  $\text{NH}_4^+$  reacquisition by *R. palustris*  $\Delta\text{AmtB}$  (in an *R. palustris*  $\Delta\text{AmtB}$  monoculture any lost  $\text{NH}_4^+$  would remain available to *R. palustris*). We therefore tested whether coculture conditions stimulated higher nitrogenase activity using an acetylene reduction assay. In agreement with our hypothesis, *R. palustris*  $\Delta\text{AmtB}$  had increased nitrogenase activity in coculture conditions compared to monocultures, whereas *R. palustris* Nx, which

exhibits constitutive nitrogenase activity, showed similar levels in both conditions (SI Appendix Fig. S4). Thus, the relatively high WT *E. coli* population in coculture with *R. palustris*  $\Delta$ AmtB is likely due to both the competitive advantage for acquiring  $\text{NH}_4^+$  over *R. palustris*  $\Delta$ AmtB (Fig. 3) and higher  $\text{NH}_4^+$  cross-feeding levels due to increased nitrogenase activity.

***E. coli* must have a competitive advantage for  $\text{NH}_4^+$  acquisition to avoid mutualism collapse.** We were surprised to observe that cocultures of *R. palustris*  $\Delta$ AmtB paired with *E. coli*  $\Delta$ AmtB showed little growth when started from a single colony of each species (Fig. 4A), a method that we routinely use to initiate cocultures (26, 31). We reasoned that the higher *R. palustris*  $\Delta$ AmtB affinity for  $\text{NH}_4^+$  relative to *E. coli*  $\Delta$ AmtB (Fig. 3) likely led to community collapse as predicted by SyFFoN (Fig. 2). Even though SyFFoN had predicted *R. palustris* growth when outcompeting *E. coli* for  $\text{NH}_4^+$  (Fig. 2), SyFFoN likely underestimates the time required to achieve these densities, if they would be achieved at all, as SyFFoN does not take into account cell death, which is known to occur when *E. coli* growth is prevented (31). Consistent with the hypothesis that poor coculture growth was due to a competitive disadvantage of *E. coli*  $\Delta$ AmtB for  $\text{NH}_4^+$ , SyFFoN simulations indicated that starting with a larger *E. coli*  $\Delta$ AmtB population would increase the probability that any given *E. coli* cell would acquire  $\text{NH}_4^+$  versus *R. palustris* and thereby overcome the competitive disadvantage of *E. coli*  $\Delta$ AmtB for  $\text{NH}_4^+$  (SI Appendix Fig. S5). Indeed, we observed greater growth of both species when cocultures were inoculated with equal or higher relative densities of *E. coli*  $\Delta$ AmtB versus *R. palustris*  $\Delta$ AmtB (SI Appendix Fig. S5).

The explanation that mutualism collapse was due to a competitive advantage of *R. palustris*  $\Delta$ AmtB over *E. coli*  $\Delta$ AmtB for  $\text{NH}_4^+$  called into question why cocultures pairing *E. coli*  $\Delta$ AmtB with either *R. palustris* Nx or *R. palustris* Nx $\Delta$ AmtB did not collapse as well (Fig. 4), given that in all of these pairings *E. coli*  $\Delta$ AmtB is at competitive disadvantage (Fig. 3). We hypothesized that a relatively high  $\text{NH}_4^+$  excretion level by these latter *R. palustris* strains (SI Appendix Fig. S1D) could compensate for a low *E. coli*  $\text{NH}_4^+$  affinity. To explore this hypothesis we simulated cocultures with the *R. palustris* affinity for  $\text{NH}_4^+$  set high relative to that of *E. coli* ( $R_p:Ec = 1000$ ) and varied the *R. palustris*  $\text{NH}_4^+$  excretion level



(Fig. 5). Indeed, increasing *R. palustris*  $\text{NH}_4^+$  excretion was predicted to overcome a low *E. coli* affinity for  $\text{NH}_4^+$  and support growth of both species (Fig. 5). The only exception was at the highest levels of  $\text{NH}_4^+$  excretion, where *R. palustris* growth was predicted to be inhibited due to rapid *E. coli* growth and subsequent accumulation of organic acids that acidify the environment (Fig. 5) (26). These simulations suggested that *R. palustris* Nx and Nx $\Delta$ AmtB supported coculture growth with *E. coli*  $\Delta$ AmtB due to higher  $\text{NH}_4^+$  excretion levels (SI Appendix Fig. S1D), whereas a combination of low  $\text{NH}_4^+$  excretion by *R. palustris*  $\Delta$ AmtB (SI Appendix Fig. S1D) and a low affinity for  $\text{NH}_4^+$  by *E. coli*  $\Delta$ AmtB led to collapse of the mutualism in this pairing.

So far, we had only considered the effect of severe discrepancies in  $\text{NH}_4^+$  affinities between the two species (e.g., 1000-fold difference in  $K_m$  values in our simulations) as a mechanism leading to coculture collapse within the time period of a single culturing. However, we wondered if a subtle discrepancy in  $\text{NH}_4^+$  affinities could lead to coculture collapse if given more time. We therefore simulated serial transfers of cocultures with partners having different relative  $\text{NH}_4^+$  affinities (Fig. 6A, B). At equivalent  $\text{NH}_4^+$  affinities (Fig. 6A), both species were predicted to be maintained over serial transfers. However, when the relative affinities approached a threshold (relative *Rp:Ec* = 2.75), cell densities of both species were predicted to decrease over serial transfers (Fig. 6B). This decline in coculture growth is due to *E. coli* being slowly but progressively outcompeted for  $\text{NH}_4^+$  by *R. palustris*. As the difference between the *R. palustris* and *E. coli* populations expands, *R. palustris* cells have a greater chance of acquiring  $\text{NH}_4^+$  than the smaller *E. coli* population, further starving *E. coli* and simultaneously cutting off *R. palustris* from its supply of organic acids from *E. coli*.

The above prediction prompted us to investigate if cocultures pairing *R. palustris* Nx with *E. coli*  $\Delta$ AmtB were stable through serial transfers. We focused on cocultures with *R. palustris* Nx rather than *R. palustris* Nx $\Delta$ AmtB because *R. palustris* Nx has AmtB and would therefore be most likely to outcompete *E. coli*  $\Delta$ AmtB. Strikingly, after eight serial transfers of cocultures pairing *R. palustris* Nx with *E. coli*  $\Delta$ AmtB we observed coculture collapse (Fig. 6C). This observation is in stark contrast to cocultures of *R. palustris* Nx paired with WT *E. coli*, which we have serially transferred for over 100 times with no

extinction events (unpublished data). These results indicate that the recipient population must have a competitive advantage for a cross-fed nutrient versus the producer population to avoid mutualism collapse.

## Discussion

Here we demonstrate that mutualistic partners can compete for a cross-fed nutrient upon which the mutualistic interaction is based, in this case  $\text{NH}_4^+$ . This competition can impact partner frequencies and mutualism stability. Efficient nutrient reacquisition by the producer can render nutrient excretion levels insufficient for cooperative growth, starving the recipient and leading to tragedy of the commons (36). Conversely, recipient-biased competition for a cross-fed nutrient drives cooperative directionality in nutrient exchange and thereby promotes mutualism stability. One implication of these results is that inter-partner competition can influence the level of resource privatization. Within microbial interdependencies, partial privatization has primarily been thought to depend on mechanisms used by the producer to retain a portion of a communally-valuable resource (15). Our data indicate that for excreted resources having a transient availability to both mutualists, recipient acquisition mechanisms can also influence the level of producer privatization, as the competition impacts how much of a cross-fed resource will be shared versus re-acquired. In effect, recipient-biased competition avoids tragedy of the commons by enforcing partial privatization of a communally-valuable resource. The importance of the recipient having the upper hand in inter-partner competition likely applies to other synthetic cocultures and natural microbial mutualisms that are based on the cross-feeding of communally-valuable nutrients, including amino acids (37, 38) and vitamin B<sub>12</sub> (6, 11). The same rule could also apply to inter-kingdom and non-microbial examples of cross-feeding (e.g., plants and pollinators, nutrient transfer between plants and bacteria or fungi (39)) and cooperative feeding (e.g., honeyguide bird and human harvesting of bee hives (40), cooperative hunting between grouper fish and moray eels (41)). In such cases, increased privatization of a cross-fed or shared resource, for example through producer-biased competition, could threaten the mutualism upon which both species depend (15, 39, 42).

In our system, AmtB transporters were crucial determinants of inter-partner competition for  $\text{NH}_4^+$ . We were intrigued to find that when both species lacked AmtB, *R. palustris* out-competed *E. coli* for  $\text{NH}_4^+$  (Fig. 5), enough so to collapse the mutualism within a single culturing (Fig. 3). Whether by maximizing  $\text{NH}_4^+$  retention or re-acquisition, *R. palustris*, and perhaps other  $\text{N}_2$ -fixers, might have additional mechanisms aside from AmtB to minimize loss of  $\text{NH}_4^+$  as  $\text{NH}_3$ . These mechanisms could include a relatively low internal pH to favor  $\text{NH}_4^+$  over  $\text{NH}_3$ , negatively-charged surface features, or relatively high affinities by  $\text{NH}_4^+$ -assimilating enzymes such as glutamine synthetase. There are several reasons why it would be beneficial for  $\text{N}_2$ -fixers to minimize  $\text{NH}_4^+$  loss. First,  $\text{N}_2$  fixation is expensive, both in terms of the enzymes involved (43) and the reaction itself, costing 16 ATP to convert one  $\text{N}_2$  into two  $\text{NH}_3$  (33). Passive loss of  $\text{NH}_3$  would only add to this cost, as more  $\text{N}_2$  would have to be fixed to compensate. Second, loss of  $\text{NH}_4^+$  could benefit nearby microbes competing against an  $\text{N}_2$ -fixer for separate limiting nutrients (14, 44). The possibility that  $\text{N}_2$ -fixers could have a superior ability to retain or acquire  $\text{NH}_4^+$  independently of AmtB is not farfetched. Bacteria are known to exhibit differential abilities to compete for nutrients. For example, iron acquisition commonly involves iron-binding siderophores, but siderophores can be chemically distinct and thereby differ in their affinity for iron (45). Strategies to utilize siderophores as a shared resource are also numerous, leading to different cooperative or competitive outcomes in microbial communities (45, 46). One must consider that additional mechanisms for acquiring  $\text{NH}_4^+$  beyond AmtB might likewise exist. As our results have raised the potential for inter-partner competition for cross-fed resources themselves, understanding the physiological mechanisms that confer competitive advantages for nutrient acquisition between species will undoubtedly aid in describing the interplay between competition and cooperation within mutualisms.

## Materials and Methods

**Strains and growth conditions.** Strains, plasmids, and primers are listed in SI Appendix Table S2. All *R. palustris* strains contained *ΔuppE* and *ΔhupS* mutations to facilitate accurate colony forming unit (CFU) measurements by preventing cell aggregation (47) and to prevent  $\text{H}_2$  uptake, respectively. *E. coli* was

cultivated on Luria-Burtani (LB) agar and *R. palustris* on defined mineral (PM) (48) agar with 10 mM succinate. (NH<sub>4</sub>)<sub>2</sub>SO<sub>4</sub> was omitted from PM agar for determining *R. palustris* CFUs. Monocultures and cocultures were grown in 10-mL of defined M9-derived coculture medium (MDC) (26) in 27-mL anaerobic test tubes. To make the medium anaerobic, MDC was bubbled with N<sub>2</sub>, then tubes were sealed with rubber stoppers and aluminum crimps, and then autoclaved. After autoclaving, MDC was supplemented with cation solution (1 % v/v; 100 mM MgSO<sub>4</sub> and 10 mM CaCl<sub>2</sub>) and glucose (25 mM), unless indicated otherwise. *E. coli* monocultures were also supplemented with 15mM NH<sub>4</sub>Cl. All cultures were grown at 30°C laying horizontally under a 60 W incandescent bulb with shaking at 150 rpm. Starter cocultures were inoculated with 200 µL MDC containing a suspension of a single colony of each species. Test cocultures were inoculated using a 1% inoculum from starter cocultures. Serial transfers were also inoculated with a 1% inoculum. Kanamycin and gentamycin were added to a final concentration of 100 µg/ml for *R. palustris* and 15 µg/ml for *E. coli* where appropriate.

**Generation of *R. palustris* mutants.** *R. palustris* mutants were derived from wild-type CGA009 (49). Generation of strains CGA4004, CGA4005, and CGA4021 was described previously (26). For generation of strain CGA4026 (*R. palustris* Δ*AmtB*) the WT *nifA* gene was amplified using primers JBM1 and JBM2, digested with XbaI and BamHI, and ligated into plasmid pJQ200SK to make pJQnifA16. This suicide vector was then introduced into CGA4021 by conjugation, and sequential selection and screening was performed as described (50) to replace *nifA*\* with WT *nifA*. Reintroduction of the WT *nifA* gene was confirmed by PCR and sequencing.

**Generation of the *E. coli* Δ*AmtB* mutant.** P1 transduction (51) was used to introduce Δ*amtB*::*Km* from the Keio collection strain JW0441-1 (52) into MG1655. The Δ*amtB*::*Km* genotype of kanamycin-resistant colonies was confirmed by PCR and sequencing.

**Analytical procedures.** Cell density was assayed by optical density at 660 nm (OD<sub>660</sub>) using a Genesys 20 visible spectrophotometer (Thermo-Fisher, Waltham, MA, USA). Growth curve readings were taken in culture tubes without sampling (i.e., Tube OD<sub>660</sub>). Specific growth rates were determined using readings between 0.1-1.0 OD<sub>660</sub> where there is linear correlation between cell density and OD<sub>660</sub>. Final

OD<sub>660</sub> measurements were taken in cuvettes and samples were diluted into the linear range as necessary.

H<sub>2</sub> was quantified using a Shimadzu (Kyoto, Japan) gas chromatograph (GC) with a thermal conductivity detector as described (53). Glucose, organic acids, formate and ethanol were quantified using a Shimadzu high-performance liquid chromatograph (HPLC) as described (54). NH<sub>4</sub><sup>+</sup> was quantified using an indophenol colorimetric assay as described (26).

**Nitrogenase activity.** Nitrogenase activity was measured using an acetylene reduction assay (43). Cells from 10-mL cultures were harvested and resuspended in 10-mL fresh MDC medium in 27-mL sealed tubes pre-flushed with argon gas. Suspensions were incubated in light for 1 h at 30°C to recover. Then, 250 µl of 100% acetylene gas was injected into the headspace to initiate the assay, and ethylene production was measured over time by gas chromatography as described (43). Ethylene levels were normalized to total *R. palustris* CFUs in the 10-ml volume.

**NH<sub>4</sub><sup>+</sup> competition assay.** Fed-batch cultures were performed in custom anaerobic 75-ml serum vials with side sampling ports. Each vial contained a stir bar and 30-mL of MDC, and was sealed at both ends with rubber stoppers and aluminum crimps. Each vial was supplemented with 25 mM glucose, 1 % v/v cation solution and 20 mM sodium acetate. Starter monocultures of each species were grown to equivalent CFUs/mL in MDC tubes containing limiting nutrients (3 mM sodium acetate for *R. palustris* and 1.5 mM NH<sub>4</sub>Cl for *E. coli*), and 1 mL of each species was inoculated into the serum vials. These competition cocultures were incubated at 30°C under a 60 W incandescent bulb with stirring at 200 rpm (Thermo Scientific) for 96 h. Each serum vial was constantly flushed with Ar to maintain anaerobic conditions. NH<sub>4</sub>Cl was fed from a 500 µM NH<sub>4</sub>Cl stock using a peristaltic pump (Watson-Marlow) on an automatic timer (Intermatic DT620) at a rate of 0.33 mL/min once an hour for a final concentration of ~ 5 µM upon each addition. Samples were taken at 0 and 96 h for quantification of CFUs.

**Mathematical modeling.** A Monod model describing bi-directional cross-feeding in batch cultures, called SyFFoN\_v3 (Syntrophy between Fermenter and Fixer of Nitrogen), was modified from our previous model (31) to allow for competition between *E. coli* and *R. palustris* for NH<sub>4</sub><sup>+</sup> as follows: (i) an equation for *R. palustris* growth rate on NH<sub>4</sub><sup>+</sup> was added to boost the *R. palustris* growth rate when

acquiring  $\text{NH}_4^+$  and (ii) the ability for *R. palustris* to consume  $\text{NH}_4^+$  was added along with a  $K_m$  of *R. palustris* for  $\text{NH}_4^+$  ( $K_{AR}$ ). Equations and default parameter values are in the SI Appendix and Table S1. SyFFoN\_v3 runs in R studio and is available for download at: <https://github.com/McKinlab/Coculture-Mutualism>.

## Acknowledgments

We thank Richard Phillips (Indiana University) for providing equipment for the  $\text{NH}_4^+$  competition assay. We also thank Jay Lennon (Indiana University) for helpful discussions on the manuscript. This work was supported in part by the U.S. Department of Energy, Office of Science, Office of Biological and Environmental Research, under Award Number DE-SC0008131, by the U.S. Army Research Office, grant W911NF-14-1-0411, and by the Indiana University College of Arts and Sciences.

## References

1. Flint HJ, Duncan SH, Scott KP, Louis P. (2007) Interactions and competition within the microbial community of the human colon: Links between diet and health. *Environ Microbiol.* **9**(5):1101–1111.
2. Hammer ND, et al. (2014) Inter- and intraspecies metabolite exchange promotes virulence of antibiotic-resistant *Staphylococcus aureus*. *Cell Host Microbe.* **16**(4):531–537.
3. McInerney MJ, Sieber JR, Gunsalus RP. (2010) Syntrophy in anaerobic global carbon cycles. *Curr Opin Biotechnol.* **20**(6):623–632.
4. Durham BP, et al. (2015) Cryptic carbon and sulfur cycling between surface ocean plankton. *Proc Natl Acad Sci U S A.* **112**(2):453–457.
5. Reeburgh WS. (2007) Oceanic Methane Biogeochemistry. *Chem Rev.* **107**(2):486–513.
6. Croft MT, Lawrence AD, Raux-Deery E, Warren MJ, Smith AG. (2005) Algae acquire vitamin B<sub>12</sub> through a symbiotic relationship with bacteria. *Nature.* **438**:90–93.
7. McInerney MJ, et al. (2008) Physiology, ecology, phylogeny, and genomics of microorganisms capable of syntrophic metabolism. *Ann N Y Acad Sci.* **1125**:58–72.

8. Hillesland KL, Stahl DA. (2010) Rapid evolution of stability and productivity at the origin of a microbial mutualism. *Proc Natl Acad Sci U S A*. **107**(5):2124–2129.
9. Schink B. (1997) Energetics of syntrophic cooperation in methanogenic degradation. *Microbiol Mol Biol Rev*. **61**(2):262–280.
10. Stams AJM. (1994) Metabolic interactions between anaerobic bacteria in methanogenic environments. *Antonie van Leeuwenhoek, Int J Gen Mol Microbiol*. **66**:271–294.
11. Grant MA, Kazamia E, Cicuta P, Smith AG. (2014) Direct exchange of vitamin B<sub>12</sub> is demonstrated by modeling the growth dynamics of algal-bacterial cocultures. *ISME J* **8**(7):1–10.
12. Seth EC, Taga ME. (2014) Nutrient cross-feeding in the microbial world. *Front Microbiol*. **5**:1-6.
13. Behrens S, et al. (2008) Linking microbial phylogeny to metabolic activity at the single-cell level by using enhanced element labeling-catalyzed reporter deposition fluorescence in situ hybridization (EL-FISH) and NanoSIMS. *Appl Environ Microbiol*. **74**(10):3143–3150.
14. Adam B et al. (2016) N<sub>2</sub>-fixation, ammonium release and N-transfer to the microbial and classical food web within a plankton community. *ISME J*. **10**:450-459.
15. Estrela S, Morris JJ, Kerr B (2016) Private benefits and metabolic conflicts shape the emergence of microbial interdependencies. *Environ Microbiol*. **18**(5):1415–1427.
16. Meyer JS, Tsuchiya HM. (1975) Dynamics of mixed populations having complementary metabolism. *Biotechnol Bioeng*. **17**:1065–1081.
17. Kim HJ, Boedicker JQ, Choi JW, Ismagilov RF. (2008) Defined spatial structure stabilizes a synthetic multispecies bacterial community. *Proc Natl Acad Sci U S A*. **105**(47):18188–18193.
18. Miura Y, Tanaka H, Okazaki M. (1980) Stability analysis of commensal and mutual relations with competitive assimilation in continuous mixed culture. *Biotechnol Bioeng*. **22**(5):929–946.
19. Estrela S, Trisos CH, Brown SP. (2012) From metabolism to ecology: cross-feeding interactions shape the balance between polymicrobial conflict and mutualism. *Am Nat*. **180**(5):566–576.
20. Bulen WA, LeCompte JR. (1966) The nitrogenase system from *Azotobacter*: two-enzyme requirement for N<sub>2</sub> reduction, ATP-dependent H<sub>2</sub> evolution, and ATP hydrolysis. *Proc Natl Acad Sci U S A*. **56**(3):979–986.



21. Walter A, Gutknecht J. (1986) Permeability of small nonelectrolytes through lipid bilayer membranes. *J Membr Biol.* **90**(3):207–217.
22. Kim M, et al. (2012) Need-based activation of ammonium uptake in *Escherichia coli*. *Mol Syst Biol* **8**(616):1–10.
23. Peng J, Huang CH. (2006) Rh proteins vs Amt proteins: an organismal and phylogenetic perspective on CO<sub>2</sub> and NH<sub>3</sub> gas channels. *Transfus Clin Biol.* **13**(1–2):85–94.
24. Barney BM, Eberhart LJ, Ohlert JM, Knutson CM, Plunkett MH. (2015) Gene deletions resulting in increased nitrogen release by *Azotobacter vinelandii*: Application of a novel nitrogen biosensor. *Appl Environ Microbiol.* **81**(13):4316–4328.
25. Zhang T, et al. (2012) Involvement of the ammonium transporter AmtB in nitrogenase regulation and ammonium excretion in *Pseudomonas stutzeri* A1501. *Res Microbiol.* **163**(5):332–339.
26. LaSarre B, McCully AL, Lennon JT, McKinlay JB. (2017) Microbial mutualism dynamics governed by dose-dependent toxicity of cross-fed nutrients. *ISME J.* **11**:337–348.
27. Widder S, et al. (2016) Challenges in microbial ecology: building predictive understanding of community function and dynamics. *ISME J.* **10**:2557–2568.
28. Momeni B, Chen CC, Hillesland KL, Waite A, Shou W. (2011) Using artificial systems to explore the ecology and evolution of symbioses. *Cell Mol Life Sci.* **68**(8):1353–1368.
29. Lindemann SR, et al. (2016) Engineering microbial consortia for controllable outputs. *ISME J.* **10**:2077–2084.
30. McKinlay JB, Harwood CS. (2010) Carbon dioxide fixation as a central redox cofactor recycling mechanism in bacteria. *Proc Natl Acad Sci U S A.* **107**(26):11669–11675.
31. McCully AL, LaSarre B, McKinlay JB. (2017) Growth-independent cross-feeding modifies boundaries for coexistence in a bacterial mutualism. *bioRxiv*. doi: <https://doi.org/10.1101/083386>
32. Yakunin AF, Hallenbeck PC. (2002) AmtB is necessary for NH<sub>4</sub><sup>+</sup>-induced nitrogenase switch-off and ADP-ribosylation in *Rhodobacter capsulatus*. *J Bacteriol.* **184**(15):4081–4088.
33. Hoffman BM, Lukoyanov D, Dean DR, Seefeldt LC. (2013) Nitrogenase: A draft mechanism. *Acc Chem Res.* **46**(2):587–595.



34. Rey FE, Heiniger EK, Harwood CS. (2007) Redirection of metabolism for biological hydrogen production. *Appl Environ Microbiol.* **73**(5):1665–1671.
35. Heiniger EK, Oda Y, Samanta SK, Harwood CS. (2012) How posttranslational modification of nitrogenase is circumvented in *Rhodopseudomonas palustris* strains that produce hydrogen gas constitutively. *Appl Environ Microbiol.* **78**(4):1023–1032.
36. Rankin DJ, Bargum K, Kokko H. (2007) The tragedy of the commons in evolutionary biology. *Trends Ecol Evol.* **22**(12):643–651.
37. Pande S, et al. (2014) Fitness and stability of obligate cross-feeding interactions that emerge upon gene loss in bacteria. *ISME J.* **8**(5):953–62.
38. Harcombe W. (2010) Novel cooperation experimentally evolved between species. *Evolution.* **64**(7):2166–2172.
39. Bronstein JL. (2001) The Exploitation of Mutualisms. *Ecol Lett.* **4**:277–287.
40. Isack HA, Reyer H-U. (1989) Honeyguides and honey gatherers: Interspecific communication in a symbiotic relationship. *Science.* **243**(4896):1343–1346.
41. Bshary R, Hohner A, Ait-el-Djoudi K, Fricke H. (2006) Interspecific communicative and coordinated hunting between groupers and giant moray eels in the red sea. *PLoS Biol* **4**(12):2393–2398.
42. Sachs JL, Mueller UG, Wilcox TP, Bull JJ. (2004) The evolution of cooperation. *Q Rev Biol.* **51**(2):211–244.
43. Oda Y, et al. (2005) Functional genomic analysis of three nitrogenase isozymes in the photosynthetic bacterium *Rhodopseudomonas palustris*. *Am Soc Microbiol.* **187**(22):7784–7794.
44. Morris JJ, Lenski RE, Zinser ER. (2012) The black queen hypothesis: Evolution of dependencies through adaptive gene loss. *mBio.* **3**(2):1–7.
45. Joshi F, Archana G, Desai A. (2006) Siderophore cross-utilization amongst rhizospheric bacteria and the role of their differential affinities for Fe<sup>3+</sup> on growth stimulation under iron-limited conditions. *Curr Microbiol.* **53**(2):141–147.
46. Niehus R, Picot A, Oliveira NM, Mitri S, Foster KR. (2017) The evolution of siderophore production as a competitive trait. *Evolution.* doi:10.1111/evo.13230.

47. Fritts RK, Lasarre B, Stoner AM, Posto AL, Mckinlay JB (2017) A *Rhizobiales*-specific unipolar polysaccharide adhesin contributes to *Rhodopseudomonas palustris* biofilm formation across diverse photoheterotrophic conditions. *Appl Environ Microbiol.* **83**(4):1–14.
48. Kim M-K, Harwood CS (1991) Regulation of benzoate-CoA ligase in *Rhodopseudomonas palustris*. *FEMS Microbiol Lett.* **83**:199–203.
49. Larimer FW, et al. (2004) Complete genome sequence of the metabolically versatile photosynthetic bacterium *Rhodopseudomonas palustris*. *Nat Biotechnol.* **22**(1):55–61.
50. Rey FE, Oda Y, Harwood CS. (2006) Regulation of uptake hydrogenase and effects of hydrogen utilization on gene expression in *Rhodopseudomonas palustris*. *J Bacteriol.* **188**(17):6143–6152.
51. Thomason LC, Costantino N, Court DL. (2007) *E. coli* Genome manipulation by P1 transduction. *Curr Protoc Mol Biol.* doi 10.1002/0471142727.mb0117s79
52. Baba T, et al. (2006) Construction of *Escherichia coli* K-12 in-frame, single-gene knockout mutants: the Keio collection. *Mol Syst Biol.* **2**:2006.0008.
53. Huang JJ, Heiniger EK, McKinlay JB, Harwood CS. (2010) Production of hydrogen gas from light and the inorganic electron donor thiosulfate by *Rhodopseudomonas palustris*. *Appl Environ Microbiol.* **76**(23):7717–7722.
54. McKinlay JB, Zeikus JG, Vieille C. (2005) Insights into *Actinobacillus succinogenes* fermentative metabolism in a chemically defined growth medium. *Appl Env Microbiol.* **71**(11):6651–6656.

# Figure Legends

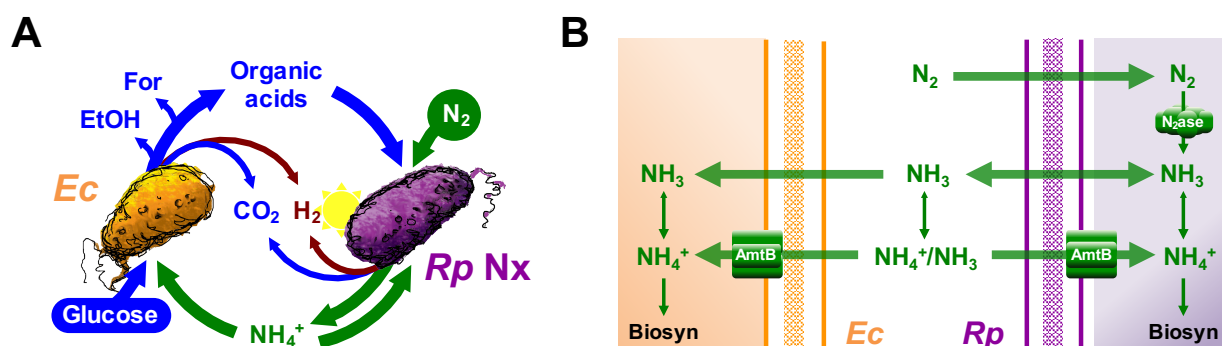

**Fig. 1. Mechanisms of NH<sub>4</sub><sup>+</sup> transfer within an obligate bacterial mutualism based on cross-feeding of essential nutrients.** (A) *Escherichia coli* (Ec) anaerobically ferments glucose into organic acids, supplying *Rhodospseudomonas palustris* Nx (Rp Nx) with essential carbon. *R. palustris* Nx fixes N<sub>2</sub> gas and excretes NH<sub>4</sub><sup>+</sup>, supplying *E. coli* with essential nitrogen. For, formate; EtOH, ethanol. (B) NH<sub>4</sub><sup>+</sup> can be passively lost from cells as NH<sub>3</sub>. Both species encode high-affinity NH<sub>4</sub><sup>+</sup> transporters, AmtB, that facilitate NH<sub>4</sub><sup>+</sup> uptake. NH<sub>4</sub><sup>+</sup> is the predominant form at neutral pH, as indicated by an enlarged arrow head on double-sided arrows.

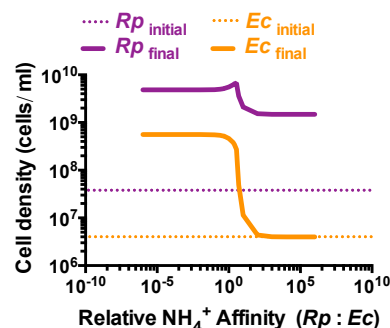

**Fig. 2. Simulations suggest that *E. coli* must have a competitive advantage for NH<sub>4</sub><sup>+</sup> acquisition relative to *R. palustris* to support mutualistic growth.** Final cell densities (solid lines) of *R. palustris* (Rp, purple) and *E. coli* (Ec, orange) after 300 h in simulated batch cultures for a range of relative NH<sub>4</sub><sup>+</sup> affinities. Initial cell densities are indicated by dotted lines. Relative NH<sub>4</sub><sup>+</sup> affinity values represent the relative *E. coli* K<sub>m</sub> for NH<sub>4</sub><sup>+</sup> (K<sub>A</sub>) divided by that of *R. palustris* (K<sub>AR</sub>).

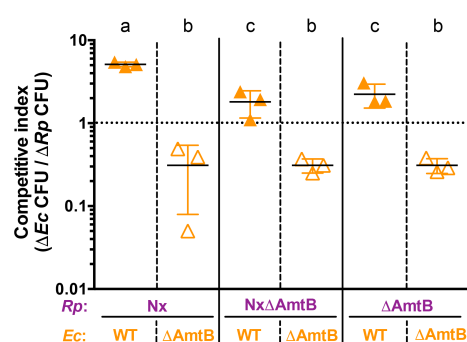

**Fig. 3. AmtB is important for competitive  $\text{NH}_4^+$  acquisition.** Competitive indices for *E. coli* after 96 h in  $\text{NH}_4^+$ -limited competition assay cocultures. Cocultures were inoculated with *E. coli* and *R. palustris* at equivalent cell densities with excess carbon available for both species (25 mM glucose for *E. coli* and 20 mM sodium acetate for *R. palustris*).  $\text{NH}_4^+$  was added to cocultures to a final concentration of 0.5  $\mu\text{M}$  every hour for 96 h. The dotted line indicates a competitive index value of 1, where both species are equally competitive for  $\text{NH}_4^+$ . Filled triangles, WT *E. coli*; open triangles *E. coli*  $\Delta\text{AmtB}$ . Error bars indicate SD, n=3. Different letters indicate statistical differences between *E. coli* competitive index values,  $p < 0.05$ , determined by one-way ANOVA with Tukey's multiple comparisons post test.

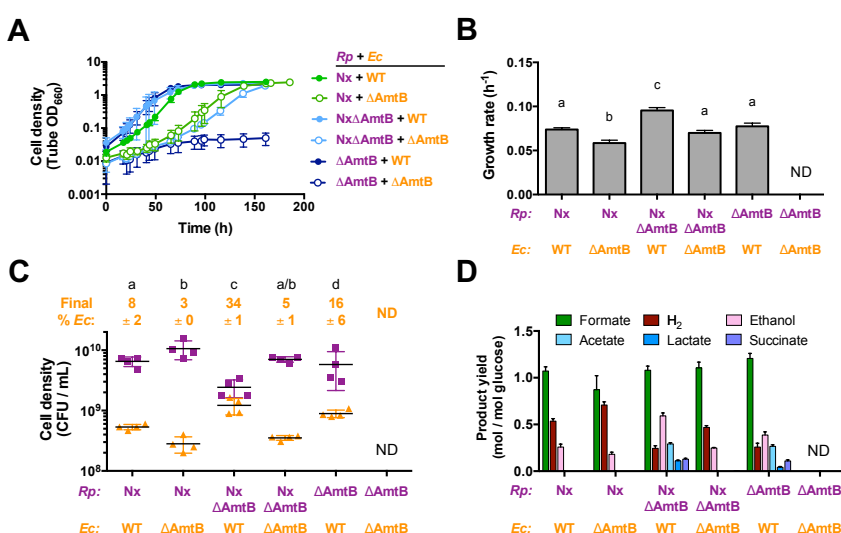

**Fig. 4.  $\text{NH}_4^+$  transporters influence population and metabolic trends of both partners in coculture.** Growth curves (A), growth rates (B), final cell densities after one culturing (C), and fermentation product yields (D) from cocultures of all combinations of mutants lacking AmtB in each species. Final cell

densities and fermentation product yields were taken after one week, within 24 h into stationary phase. ND, not determined. Error bars indicate SD, n=4. Different letters indicate statistical differences,  $p < 0.05$ , determined by one-way ANOVA with Tukey's multiple comparisons post test.

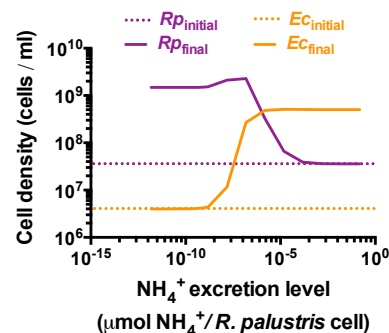

**Fig. 5. Higher *R. palustris*  $\text{NH}_4^+$  excretion levels are predicted to compensate for a low *E. coli*  $\text{NH}_4^+$  affinity.** 300 h batch cultures were simulated with a relative *R. palustris* : *E. coli* (*Ec* : *Rp*)  $K_m$  value for  $\text{NH}_4^+$  of 0.001 over different *R. palustris*  $\text{NH}_4^+$  excretion levels ( $R_A$ ). Final cell densities, solid lines; initial cell densities, dotted lines.

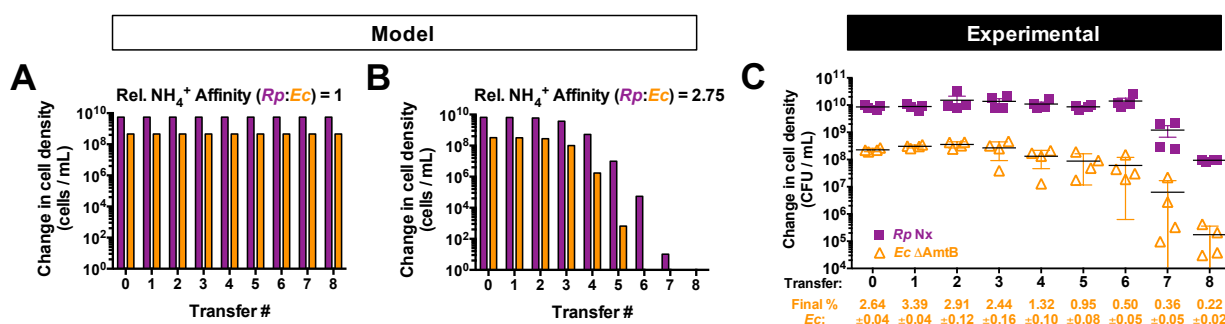

**Fig. 6. A low *E. coli*  $\text{NH}_4^+$  affinity results in coculture collapse over serial transfers when paired with *R. palustris* Nx.** (A,B) 300 h batch cultures were simulated and serial transferred used a 1% inoculum based on the cell density at 300 h for the previous culture. Relative  $\text{NH}_4^+$  affinity values represent the relative *E. coli*  $K_m$  for  $\text{NH}_4^+$  ( $K_A$ ) divided by that of *R. palustris* ( $K_{AR}$ ). (C) Final cell densities of *R. palustris* Nx and *E. coli*  $\Delta\text{AmtB}$  of cocultures grown for one week, less than 24 h into stationary phase. A 1% inoculum was used for each subsequent serial transfer. Error bars indicate SD, n=4. Final *E. coli* cell percentages  $\pm$  SD for each transfer are shown.

# Recipient-biased competition for a cross-fed nutrient is required for coexistence of microbial mutualists

Alexandra L. McCully, Breah LaSarre, James B. McKinlay

Department of Biology, Indiana University, Bloomington

## SI Appendix.

### SyFFoN\_v3 description.

Equations 1 – 4 were used to describe *E. coli* and *R. palustris* growth rates:

Eq. 1: *E. coli* growth rate;  $\mu_{Ec} = \mu_{EcMAX} \cdot [G/(K_G + G)] \cdot [A/(K_A + A)] \cdot [b_{Ec}/(b_{Ec} + 10^{(f+C)})]$

Eq. 2: *R. palustris* growth rate ( $N_2$ );  $\mu_{Rpn} = \mu_{RpnMAX} \cdot [C/(K_C + C)] \cdot [N/(K_N + N)] \cdot [b_{Rp}/(b_{Rp} + 10^{(f+C)})]$

Eq. 3: *R. palustris* growth rate ( $NH_4^+$ );  $\mu_{Rpa} = \mu_{RpaMAX2} \cdot [C/(K_C + C)] \cdot [A/(K_{AR} + A)] \cdot [b_{Rp}/(b_{Rp} + 10^{(f+C)})]$

Eq 4: Total *R. palustris* growth rate;  $\mu_{Rp} = \mu_{Rpn} + \mu_{Rpa}$

Equations 5-14 were used to describe temporal changes in cell densities and extracellular compounds. Numerical constants in product excretion equations are used to account for molar stoichiometric conversions. Numerical constants used in sigmoidal functions are based on those values that resulted in simulations resembling empirical trends. All R and r parameters are expressed in terms of glucose consumed except for  $R_A$ , which is the amount of  $NH_4^+$  produced per *R. palustris* cell (Table S1).

Eq. 5: Glucose;  $dG/dt = -\mu_{Ec} \cdot Ec/Y_G - \mu_{Ec} \cdot Ec \cdot (R_c + R_f + R_e + R_{CO2}) - Ec \cdot (G/(K_G + G)) \cdot (10/(10 + 1.09^{(1000 \cdot \mu_{Ec})})) \cdot (b_{Ec}/(b_{Ec} + 10^{(f+C)})) \cdot ((100/(100 + 6^C)) \cdot (r_C + r_f + r_e + r_{CO2}) + r_{C\_mono} + r_{f\_mono} + r_{e\_mono} + r_{CO2\_mono})$

Eq. 6:  $N_2$ ;  $dN/dt = -\mu_{Rp} \cdot Rp \cdot 0.5 \cdot R_A \cdot (1 - (40/(40 + 1.29^N))) - \mu_{Rp} \cdot Rp/Y_N$

Eq. 7: Consumable organic acids;  $dC/dt = Ec \cdot \mu_{Ec} \cdot R_c \cdot 2 + Ec \cdot 2 \cdot (G/(K_G + G)) \cdot (10/(10 + 1.09^{(1000 \cdot \mu_{Ec})})) \cdot (b_{Ec}/(b_{Ec} + 10^{(f+C)})) \cdot (r_c \cdot (100/(100 + 6^C)) + r_{C\_mono}) - (\mu_{Rp} \cdot Rp/Y_C) - 0.25 \cdot Rp \cdot \mu_{Rp} \cdot R_{Hp} - 0.25 \cdot Rp \cdot r_{Hp} \cdot (C/(K_C + C)) \cdot (40/(40 + 1.29^N)) \cdot (b_{Rp}/(b_{Rp} + 10^{(f+C)}))$

Eq. 8: Formate;  $df/dt = (Ec \cdot \mu_{Ec} \cdot R_f \cdot 6) + Ec \cdot 6 \cdot (G/(K_G + G)) \cdot (10/(10 + 1.09^{(1000 \cdot \mu_{Ec})})) \cdot (b_{Ec}/(b_{Ec} + 10^{(f+C)})) \cdot (r_f \cdot (100/(100 + 6^C)) + r_{f\_mono})$

Eq. 9:  $NH_4^+$ ;  $dA/dt = Rp \cdot \mu_{Rp} \cdot R_A \cdot (1 - (40/(40 + 1.29^N))) - \mu_{Ec} \cdot Ec/Y_A - (\mu_{Rp} \cdot Rp/Y_{AR}) \cdot (A/(K_{AR} + A))$

Eq. 10: *E. coli*;  $dEc/dt = \mu_{Ec} \cdot Ec$

Eq. 11: *R. palustris*;  $dRp/dt = \mu_{Rp} \cdot Rp$

Eq. 12: Ethanol;  $de/dt = Ec \cdot 3 \cdot (\mu_{Ec} \cdot R_e + (G/(K_G + G)) \cdot (10/(10 + 1.09^{(1000 \cdot \mu_{Ec})})) \cdot (b_{Ec}/(b_{Ec} + 10^{(f+C)})) \cdot (r_e \cdot (100/(100 + 6^C)) + r_{e\_mono}))$

$$\begin{aligned} \text{Eq. 13: CO}_2; \frac{d\text{CO}_2}{dt} &= E_c \cdot 6 \cdot (\mu_{E_c} \cdot R_{\text{CO}_2} + (G/(K_G + G)) \cdot (10/(10 + 1.09^{(1000 \cdot \mu_{E_c})})) \\ &\quad \cdot (b_{E_c}/(b_{E_c} + 10^{(f+C)})) \cdot (r_{\text{CO}_2} \cdot (100/(100 + 6^C)) + r_{\text{CO}_2\_mono})) \\ &\quad + R_p \cdot 0.5 \cdot (\mu_{R_p} \cdot R_{H_{R_p}} + r_{H_p} \cdot (C/(K_C + C)) \cdot (40/(40 + 1.29^N)) \cdot (b_{R_p}/(b_{R_p} + 10^{(f+C)}))) \\ \text{Eq. 14: H}_2; \frac{dH}{dt} &= R_p \cdot (\mu_{R_p} \cdot R_{H_{R_p}} + r_{H_p} \cdot (C/(K_C + C)) \cdot (40/(40 + 1.29^N)) \cdot (b_{R_p}/(b_{R_p} + 10^{(f+C)}))) \\ &\quad + E_c \cdot (\mu_{E_c} \cdot R_{H_{E_c}} + (G/(K_G + G)) \cdot (10/(10 + 1.09^{(1000 \cdot \mu_{E_c})})) \cdot (b_{E_c}/(b_{E_c} + 10^{(f+C)}))) \\ &\quad \cdot (r_H \cdot (100/(100 + 6^C)) + r_{H\_mono}) \end{aligned}$$

Where,

$\mu$  is the specific growth rate of the indicated species ( $\text{h}^{-1}$ ).

$\mu_{\text{MAX}}$  is the maximum specific growth rate of the indicated species ( $\text{h}^{-1}$ ).

G, A, C, N, f, e, H and CO<sub>2</sub> are the concentrations (mM) of glucose, NH<sub>4</sub><sup>+</sup>, consumable organic acids, N<sub>2</sub>, formate, ethanol, H<sub>2</sub>, and CO<sub>2</sub>, respectively. All gasses are assumed to be fully dissolved. Consumable organic acids are those that *R. palustris* can consume, namely, lactate (3 carbons), acetate (2 carbons), and succinate (4 carbons). All consumable organic acids were simulated to have three carbons for convenience. Only net accumulation of formate, ethanol, CO<sub>2</sub> and H<sub>2</sub> are described in accordance with observed trends.

K is the half saturation constant for the indicated substrate (mM).

Ec and Rp are the cell densities (cells/ml) of *E. coli* and *R. palustris*, respectively.

b is the ability of a species to resist the inhibiting effects of acid (mM).

Y is the *E. coli* or *R. palustris* cell yield from the indicated substrate (cells /  $\mu\text{mol}$  glucose). Y values were determined in MDC with the indicated substrate as the limiting nutrient.

R is the fraction of glucose converted into the indicated compound per *E. coli* cell during growth ( $\mu\text{mol}$  of glucose / *E. coli* cell), except for R<sub>A</sub>. Values were adjusted to accurately simulate product yields measured in cocultures and in MDC with and without added NH<sub>4</sub>Cl.

R<sub>A</sub> is the ratio of NH<sub>4</sub><sup>+</sup> produced per *R. palustris* cell during growth ( $\mu\text{mol}$  / *R. palustris* cell). The default value was based on that which accurately simulated empirical trends.

r is the growth-independent rate of glucose converted into the indicated compound ( $\mu\text{mol}$  / cell / h).

Default values are based on those which accurately simulated empirical trends in coculture.

r<sub>mono</sub> is the growth-independent rate of glucose converted into the indicated compound by *E. coli* when consumable organic acids accumulate. Default values are based on linear regression of products accumulated over time in nitrogen-free cell suspensions of *E. coli* (4).

**Table S1. Default parameter values used in the model unless stated otherwise**

| Parameter      | Value                 | Description (Units); Source                                                                                                           |
|----------------|-----------------------|---------------------------------------------------------------------------------------------------------------------------------------|
| $\mu_{EcMAX}$  | 0.2800                | <i>E. coli</i> max growth rate ( $h^{-1}$ ); Monoculture                                                                              |
| $\mu_{RpMAX}$  | 0.0772                | <i>R. palustris</i> max growth rate ( $h^{-1}$ ); Monoculture                                                                         |
| $\mu_{RpMAX2}$ | 0.0152                | Boost on <i>R. palustris</i> growth rate in presence of $NH_4^+$ ( $h^{-1}$ ); Monoculture <sup>a</sup>                               |
| G              | 25                    | Glucose (mM)                                                                                                                          |
| A              | 0.00005               | $NH_4^+$ (mM); from initial $(NH_4)_6Mo_7O_{24} \cdot 4H_2O$ concentration                                                            |
| C              | 0                     | Consumable organic acids (those that <i>R. palustris</i> was observed to consume: lactate, acetate, and succinate; mM)                |
| N              | 70                    | $N_2$ (assumed to be fully dissolved; mM)                                                                                             |
| f              | 0                     | Formate (mM)                                                                                                                          |
| e              | 0                     | Ethanol (mM)                                                                                                                          |
| CO2            | 0                     | Carbon dioxide (mM)                                                                                                                   |
| $K_G$          | 0.02                  | <i>E. coli</i> affinity (Michaelis-Menten constant ( $K_m$ )) for glucose (mM); (1)                                                   |
| $K_C$          | 0.01                  | <i>R. palustris</i> affinity ( $K_m$ ) for consumable organic acids (mM); Assumed                                                     |
| $K_A$          | 0.01                  | <i>E. coli</i> affinity for $NH_4^+$ (mM); (2)                                                                                        |
| $K_{AR}$       | 0.01                  | <i>R. palustris</i> affinity for $NH_4^+$ (mM); Assumed <sup>b</sup>                                                                  |
| $K_N$          | 6                     | <i>R. palustris</i> affinity ( $K_m$ ) for $N_2$ (mM)                                                                                 |
| Ec             | $0.4 \times 10^7$     | <i>E. coli</i> cell density (cells / ml)                                                                                              |
| Rp             | $3.6 \times 10^7$     | <i>R. palustris</i> cell density (cells / ml)                                                                                         |
| $b_{Ec}$       | $10^{43}$             | Resistance of <i>E. coli</i> to low pH (mM)                                                                                           |
| $b_{Rp}$       | $10^{32}$             | Resistance of <i>R. palustris</i> to low pH (mM)                                                                                      |
| $Y_G$          | $8 \times 10^7$       | Glucose-limited <i>E. coli</i> growth yield (cells / $\mu$ mol glucose); Glucose-limited <i>E. coli</i> culture                       |
| $Y_A$          | $1 \times 10^9$       | $NH_4^+$ -limited <i>E. coli</i> growth yield (cells / $\mu$ mol $NH_4^+$ ); $NH_4^+$ -limited <i>E. coli</i> culture                 |
| $Y_C$          | $2.5 \times 10^8$     | Organic acid-limited <i>R. palustris</i> growth yield (cells / $\mu$ mol organic acid); Acetate-limited <i>R. palustris</i> culture   |
| $Y_N$          | $5 \times 10^8$       | $N_2$ -limited <i>R. palustris</i> growth yield cells / $\mu$ mol $N_2$ ; $N_2$ -limited <i>R. palustris</i> culture                  |
| $R_C$          | $1.9 \times 10^{-8}$  | Fraction of glucose converted to organic acids ( $\mu$ mol glucose / cell)                                                            |
| $R_f$          | $8 \times 10^{-9}$    | Fraction of glucose converted to formate ( $\mu$ mol glucose / cell)                                                                  |
| $R_e$          | $4.5 \times 10^{-9}$  | Fraction of glucose converted to ethanol ( $\mu$ mol glucose / cell)                                                                  |
| $R_{CO2}$      | $5 \times 10^{-10}$   | Fraction of glucose converted to $CO_2$ ( $\mu$ mol glucose / cell)                                                                   |
| $R_{HRp}$      | $2 \times 10^{-9}$    | <i>R. palustris</i> $H_2$ production ( $\mu$ mol $H_2$ / <i>R. palustris</i> cell)                                                    |
| $R_{HEc}$      | $5 \times 10^{-9}$    | <i>E. coli</i> $H_2$ production ( $\mu$ mol $H_2$ / <i>E. coli</i> cell)                                                              |
| $R_A$          | $0.15 \times 10^{-9}$ | <i>R. palustris</i> $NH_4^+$ production ( $\mu$ mol $NH_4^+$ / cell)                                                                  |
| $r_C$          | $300 \times 10^{-11}$ | <i>E. coli</i> specific growth-independent rate of glucose conversion to consumable organic acids ( $\mu$ mol glucose / cell / h) (3) |
| $r_f$          | $47 \times 10^{-11}$  | <i>E. coli</i> specific growth-independent rate of glucose conversion to formate ( $\mu$ mol glucose / cell / h) (3)                  |
| $r_e$          | $15 \times 10^{-11}$  | <i>E. coli</i> specific growth-independent rate of glucose conversion to ethanol ( $\mu$ mol glucose / cell / h) (3)                  |
| $r_{CO2}$      | $2 \times 10^{-11}$   | <i>E. coli</i> specific growth-independent rate of glucose conversion to $CO_2$ ( $\mu$ mol glucose / cell / h) (3)                   |



|                 |                        |                                                                                                                                                                           |
|-----------------|------------------------|---------------------------------------------------------------------------------------------------------------------------------------------------------------------------|
| $r_H$           | $2 \times 10^{-11}$    | <i>E. coli</i> specific growth-independent rate of H <sub>2</sub> production (μmol H <sub>2</sub> / cell / h) (3)                                                         |
| $r_{C\_mono}$   | $1.2 \times 10^{-11}$  | <i>E. coli</i> specific growth-independent rate of glucose conversion to consumable organic acids when consumable organic acids accumulate (μmol glucose / cell / h); (4) |
| $r_{f\_mono}$   | $0.83 \times 10^{-11}$ | <i>E. coli</i> specific growth-independent rate of glucose conversion to formate when consumable organic acids accumulate (μmol glucose / cell / h); (4)                  |
| $r_{e\_mono}$   | $0.5 \times 10^{-11}$  | <i>E. coli</i> specific growth-independent rate of glucose conversion to ethanol when consumable organic acids accumulate (μmol glucose / cell / h); (4)                  |
| $r_{co2\_mono}$ | $1.3 \times 10^{-11}$  | <i>E. coli</i> specific growth-independent rate of glucose conversion to CO <sub>2</sub> when consumable organic acids accumulate (μmol glucose / cell / h); (4)          |
| $r_{H\_mono}$   | $0.83 \times 10^{-11}$ | <i>E. coli</i> specific growth-independent rate of glucose conversion to H <sub>2</sub> when consumable organic acids accumulate (μmol glucose / cell / h); (4)           |
| $r_{Hp}$        | $27 \times 10^{-11}$   | <i>R. palustris</i> specific growth-independent rate of H <sub>2</sub> production (μmol H <sub>2</sub> / cell / h)                                                        |

<sup>a</sup> Increased growth rate in presence of NH<sub>4</sub><sup>+</sup> versus N<sub>2</sub> based on the difference in experimentally determined growth rates in *R. palustris* monocultures grown with either NH<sub>4</sub><sup>+</sup> or N<sub>2</sub> as a nitrogen source.

<sup>b</sup> K<sub>AR</sub> was assumed to be equivalent to the published *E. coli* K<sub>m</sub> (2) for NH<sub>4</sub><sup>+</sup> (K<sub>A</sub>).

91 Table S2. Strains, plasmids, and primers used in this study

| Strain or plasmid                  | Description or Sequence (5'-3');<br><u>Designation</u>                           | Source or Purpose                                         |
|------------------------------------|----------------------------------------------------------------------------------|-----------------------------------------------------------|
| <b><i>R. palustris</i> strains</b> |                                                                                  |                                                           |
| CGA009                             | Wild-type strain; spontaneous Cm <sup>R</sup> derivative of CGA001               | (5)                                                       |
| CGA4004                            | CGA009 $\Delta hupS \Delta rpa2750$ ; Parent                                     | (4)                                                       |
| CGA4005                            | CGA4004 <i>nifA</i> *; <u>Nx</u>                                                 | (4)                                                       |
| CGA4021                            | CGA4005 $\Delta amtB1 \Delta amtB2$ ; <u>Nx<math>\Delta</math>AmtB</u>           | (4)                                                       |
| CGA4026                            | CGA4004 $\Delta amtB1 \Delta amtB2$ ; <u><math>\Delta</math>AmtB</u>             | This study                                                |
| <b><i>E. coli</i> strains</b>      |                                                                                  |                                                           |
| MG1655                             | Wild-type K12 strain, WT                                                         | (6)                                                       |
| K-12 JW0441-1                      | Keio collection $\Delta amtB::Km$                                                | (7)                                                       |
| MG1655 $\Delta$ AmtB               | MG1655 $\Delta amtB::Km$ ; <u><math>\Delta</math>AmtB</u>                        | This study                                                |
| <b>Plasmids</b>                    |                                                                                  |                                                           |
| pJQnifA16                          | Gm <sup>R</sup> ; WT <i>nifA</i> gene flanked by XbaI/BamHI cloned into pJQ200SK | This study                                                |
| <b>Primers</b>                     |                                                                                  |                                                           |
| ALM6f                              | TTCGTCGCTGAATTGCAACG                                                             | <i>amtB</i> upstream flanking region ( <i>E. coli</i> )   |
| ALM6r                              | TCAGGAAGGGGTGATGCGTA                                                             | <i>amtB</i> downstream flanking region ( <i>E. coli</i> ) |
| JBM1                               | CGTCTAGACCGGCGCATCGC                                                             | <i>nifA16</i> upstream primer; <u>XbaI</u>                |
| JBM6                               | GGGGATCCTGGTTCGCAGAGG                                                            | <i>nifA16</i> downstream primer; <u>BamHI</u>             |

92

# SI Appendix Figures.

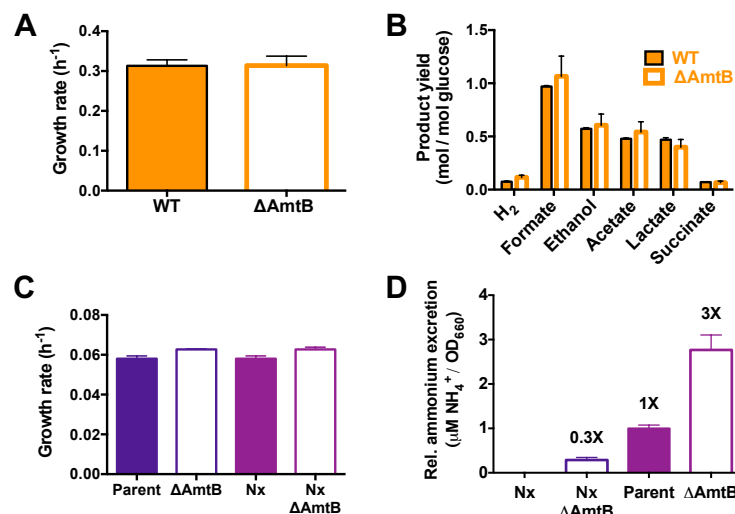

**Fig. S1. *E. coli*  $\Delta$ AmtB and *R. palustris*  $\Delta$ AmtB monoculture growth and metabolic trends. (A,B)**

Growth rates (A) and fermentation product yields (B) from WT *E. coli* (filled) or without (open) *E. coli*  $\Delta$ AmtB monocultures grown in MDC with 25 mM glucose and 15 mM  $\text{NH}_4\text{Cl}$ . Fermentation profiles were generated from stationary monocultures. Error bars indicate SD, n=3. (C,D) Growth curves (C) and relative  $\text{NH}_4^+$  excretion (D) of *R. palustris* monocultures grown in MDC with 3 mM sodium acetate and a 100%  $\text{N}_2$  headspace. Error bars indicate SD, n=4.

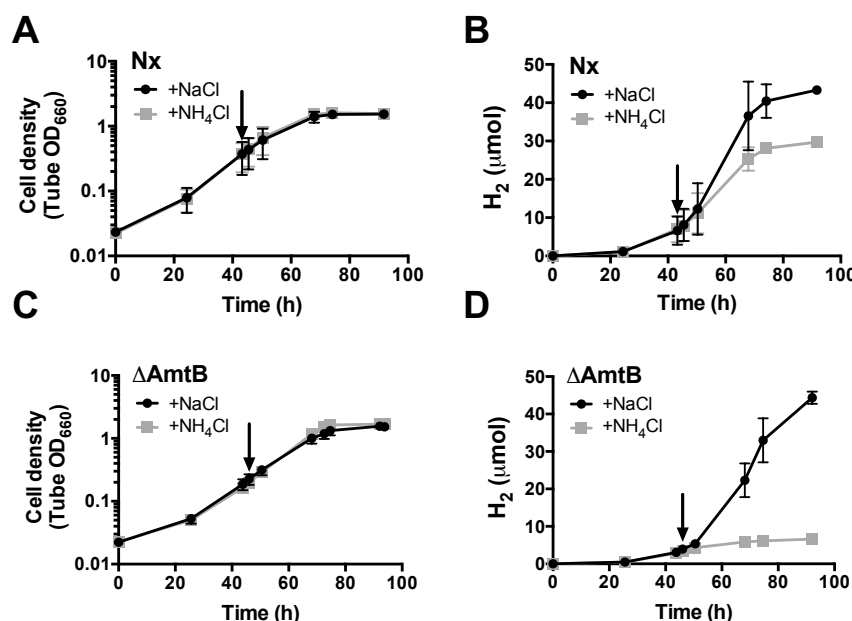

**Fig. S2. *R. palustris* ΔAmtB responds to NH<sub>4</sub><sup>+</sup>-induced shutoff of nitrogenase.** The effect of either NH<sub>4</sub>Cl or NaCl on growth (A,C) and H<sub>2</sub> production (B,D) in *R. palustris* Nx or *R. palustris* ΔAmtB monocultures. *R. palustris* monocultures were grown in MDC with 20 mM sodium acetate and a 100% N<sub>2</sub> headspace until mid-exponential phase and then supplemented with either 15 mM NH<sub>4</sub>Cl or 15 mM NaCl at the time indicated by the arrow.

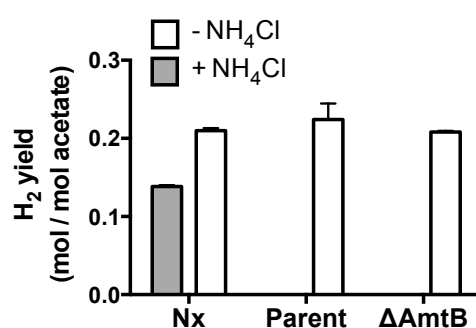

**Fig. S3. Unlike *R. palustris* Nx, *R. palustris* ΔAmtB does not produce H<sub>2</sub> when grown with NH<sub>4</sub><sup>+</sup>.** *R. palustris* monocultures were grown in MDC with 20 mM sodium acetate and a 100% N<sub>2</sub> headspace with (grey) or without (white) 15mM NH<sub>4</sub>Cl. Samples for determining H<sub>2</sub> yields were taken one week after inoculation, within 24 hours into stationary phase. Error bars indicate SD, n=3.

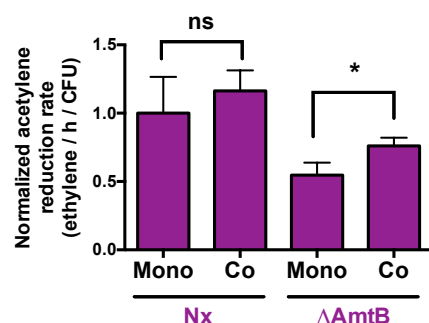

**Fig. S4. *R. palustris* ΔAmtB nitrogenase activity increases in coculture.** Normalized nitrogenase activity of *R. palustris* in monoculture (Mono) or coculture (Co) measured by an acetylene reduction assay. Ethylene levels were divided by total *R. palustris* CFUs in the test tube and then normalized to the *R. palustris* Nx monoculture value. Error bars indicate SD, n=4. \*, statistical difference between monoculture and coculture conditions,  $p < 0.05$ , determined using multiple two-tailed t-tests; ns, no significant difference.

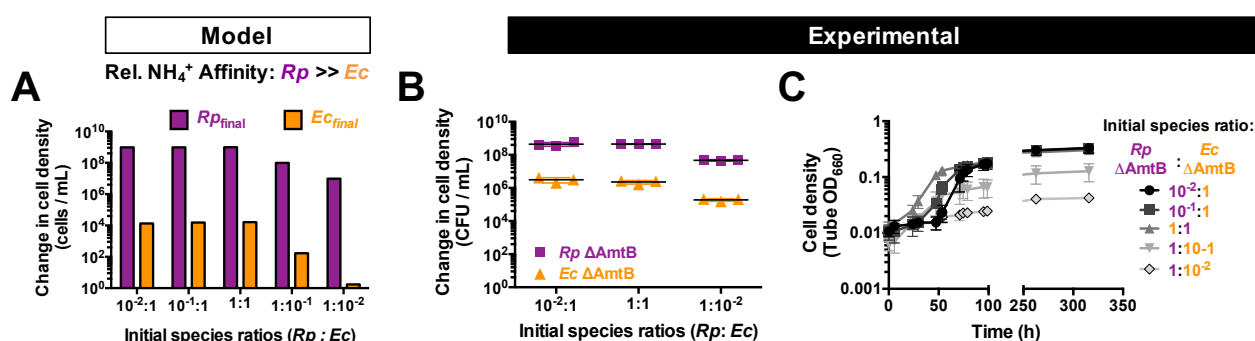

**Fig. S5. Higher initial cell densities of *E. coli* ΔAmtB can partially compensate for a low *E. coli*  $\text{NH}_4^+$  affinity.** Simulations (A) and empirical data (B,C) showing the effect of initial *E. coli* (*Ec*) cell density on population and coculture growth trends when *E. coli* has a lower affinity for  $\text{NH}_4^+$  compared to *R. palustris* (*Rp*). (A) 300 h batch cultures were simulated with a relative *R. palustris* : *E. coli* ( $Rp : Ec$ )  $K_m$  value for  $\text{NH}_4^+$  of 0.001. (B, C) Change in cell densities after one week of growth (B) and growth curves (C) of cocultures inoculated at different species ratios. (A-C) A ratio value of 1 represents  $2.7 \times 10^6$  CFUs/mL, which was experimentally measured from the starting inoculum for both species before diluting to achieve the indicated ratios. Error bars indicate SD, n=3.

# SI Appendix References.

1. Buhr A, Daniels GA, Erni B. (1992) The glucose transporter of *Escherichia coli*: Mutants with impaired translocation activity that retain phosphorylation activity. *J Biol Chem.* **267**(6):3847–3851.
2. Khademi S, et al. (2004) Mechanism of ammonia transport by Amt/MEP/Rh: structure of AmtB at 1.35 Å. *Science.* **305**(5690):1587–1594.
3. McCully AL, LaSarre B, McKinlay JB. (2017) Growth-independent cross-feeding modifies boundaries for coexistence in a bacterial mutualism. *bioRxiv.* **doi:** <https://doi.org/10.1101/083386>
4. LaSarre B, McCully AL, Lennon JT, McKinlay JB. (2017) Microbial mutualism dynamics governed by dose-dependent toxicity of cross-fed nutrients. *ISME J.* **11**:337–348.
5. Larimer FW, et al. (2004) Complete genome sequence of the metabolically versatile photosynthetic bacterium *Rhodospseudomonas palustris*. *Nat Biotechnol.* **22**(1):55–61.
6. Hayashi K, et al. (2006) Highly accurate genome sequences of *Escherichia coli* K-12 strains MG1655 and W3110. *Mol Syst Biol.* **2**(1):2006.0007.
7. Baba T, et al. (2006) Construction of *Escherichia coli* K-12 in-frame, single-gene knockout mutants: the Keio collection. *Mol Syst Biol.* **2**:2006.0008.
